# Supplementary material
Source: ML conference proceedings conference paper supplement (https://openreview.net/forum?id=G21QCS8NPm)

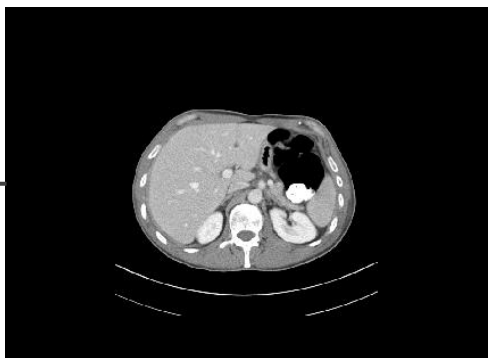

Stage1:  
CoarseSegmentation

Conformer

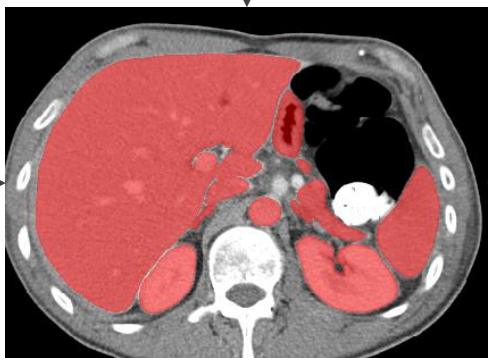

Cropping  
ROI

Stage2:  
FineSegmentation

Conformer

Organs

Conformer

Tumors

+

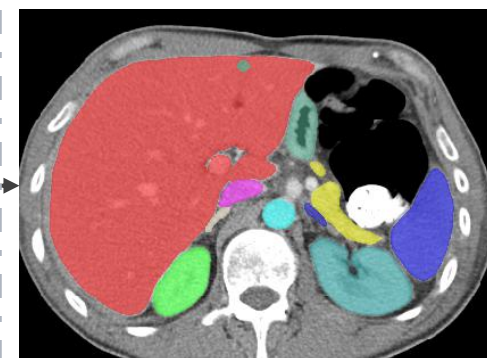

Supplement: supplementary_material [file attachment]
