# Supplementary material
Source: ML conference proceedings conference paper supplement (https://openreview.net/forum?id=G21QCS8NPm)
Supplement: supplementary_material [file attachment]

FLARE23Ts 0049

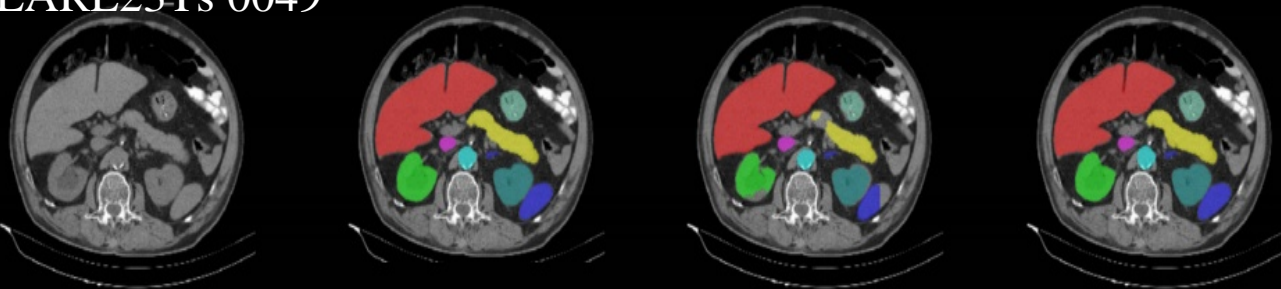

FLARE23Ts\_0019

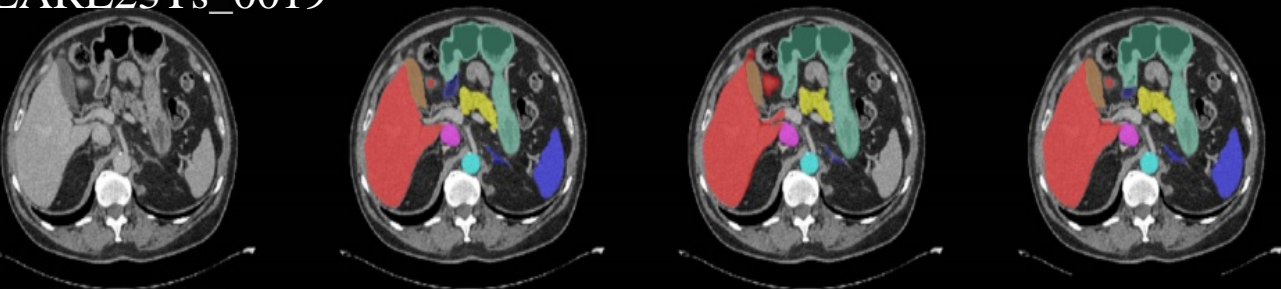

FLARE23Ts 0063

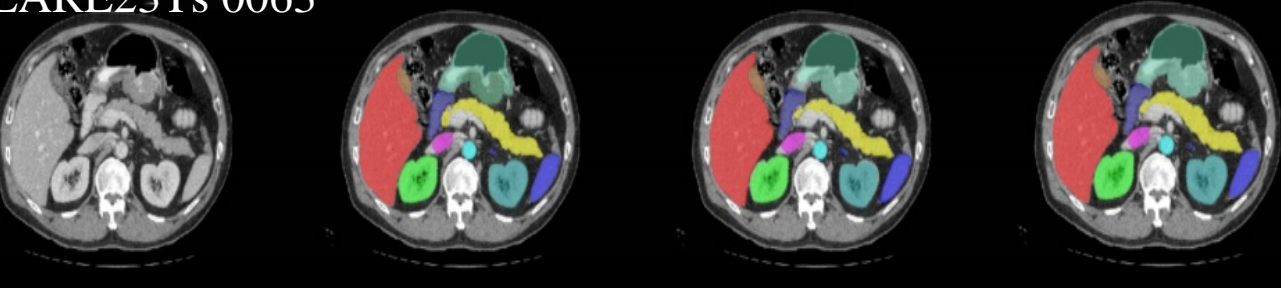

FLARE23Ts\_0011

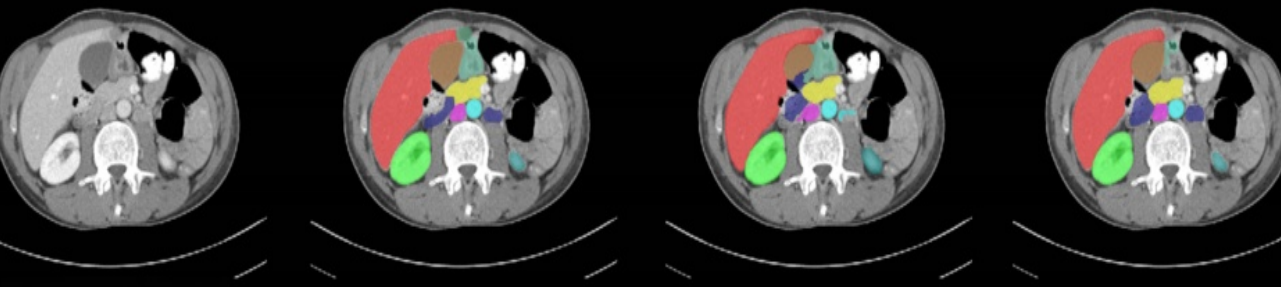

FLARE23Ts 0038

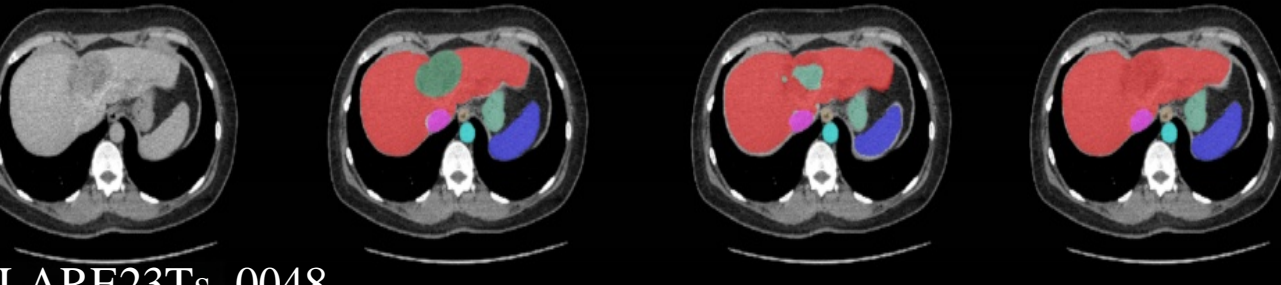

FLARE23Ts 0048

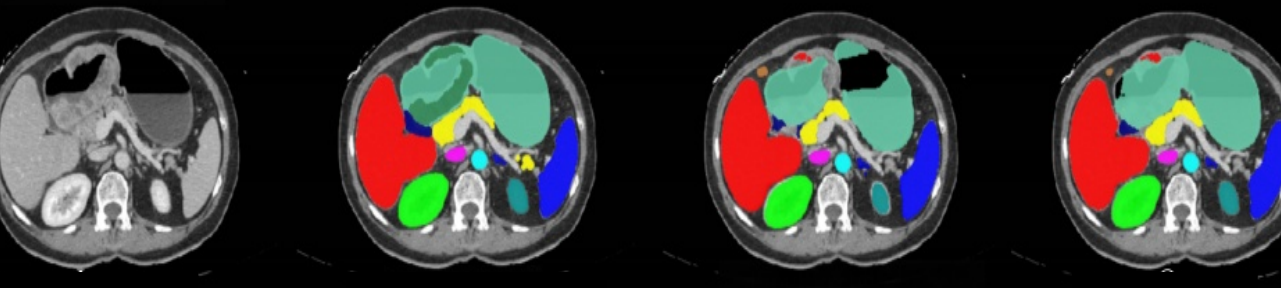

Image

Ground Truth

without Pseudo Labels

Ours
