# Supplementary material
Source: ML conference proceedings conference paper supplement (https://openreview.net/forum?id=G21QCS8NPm)

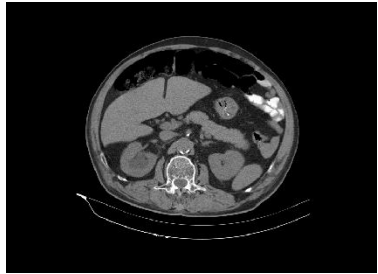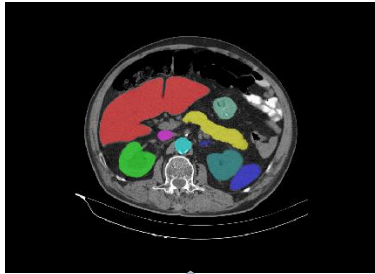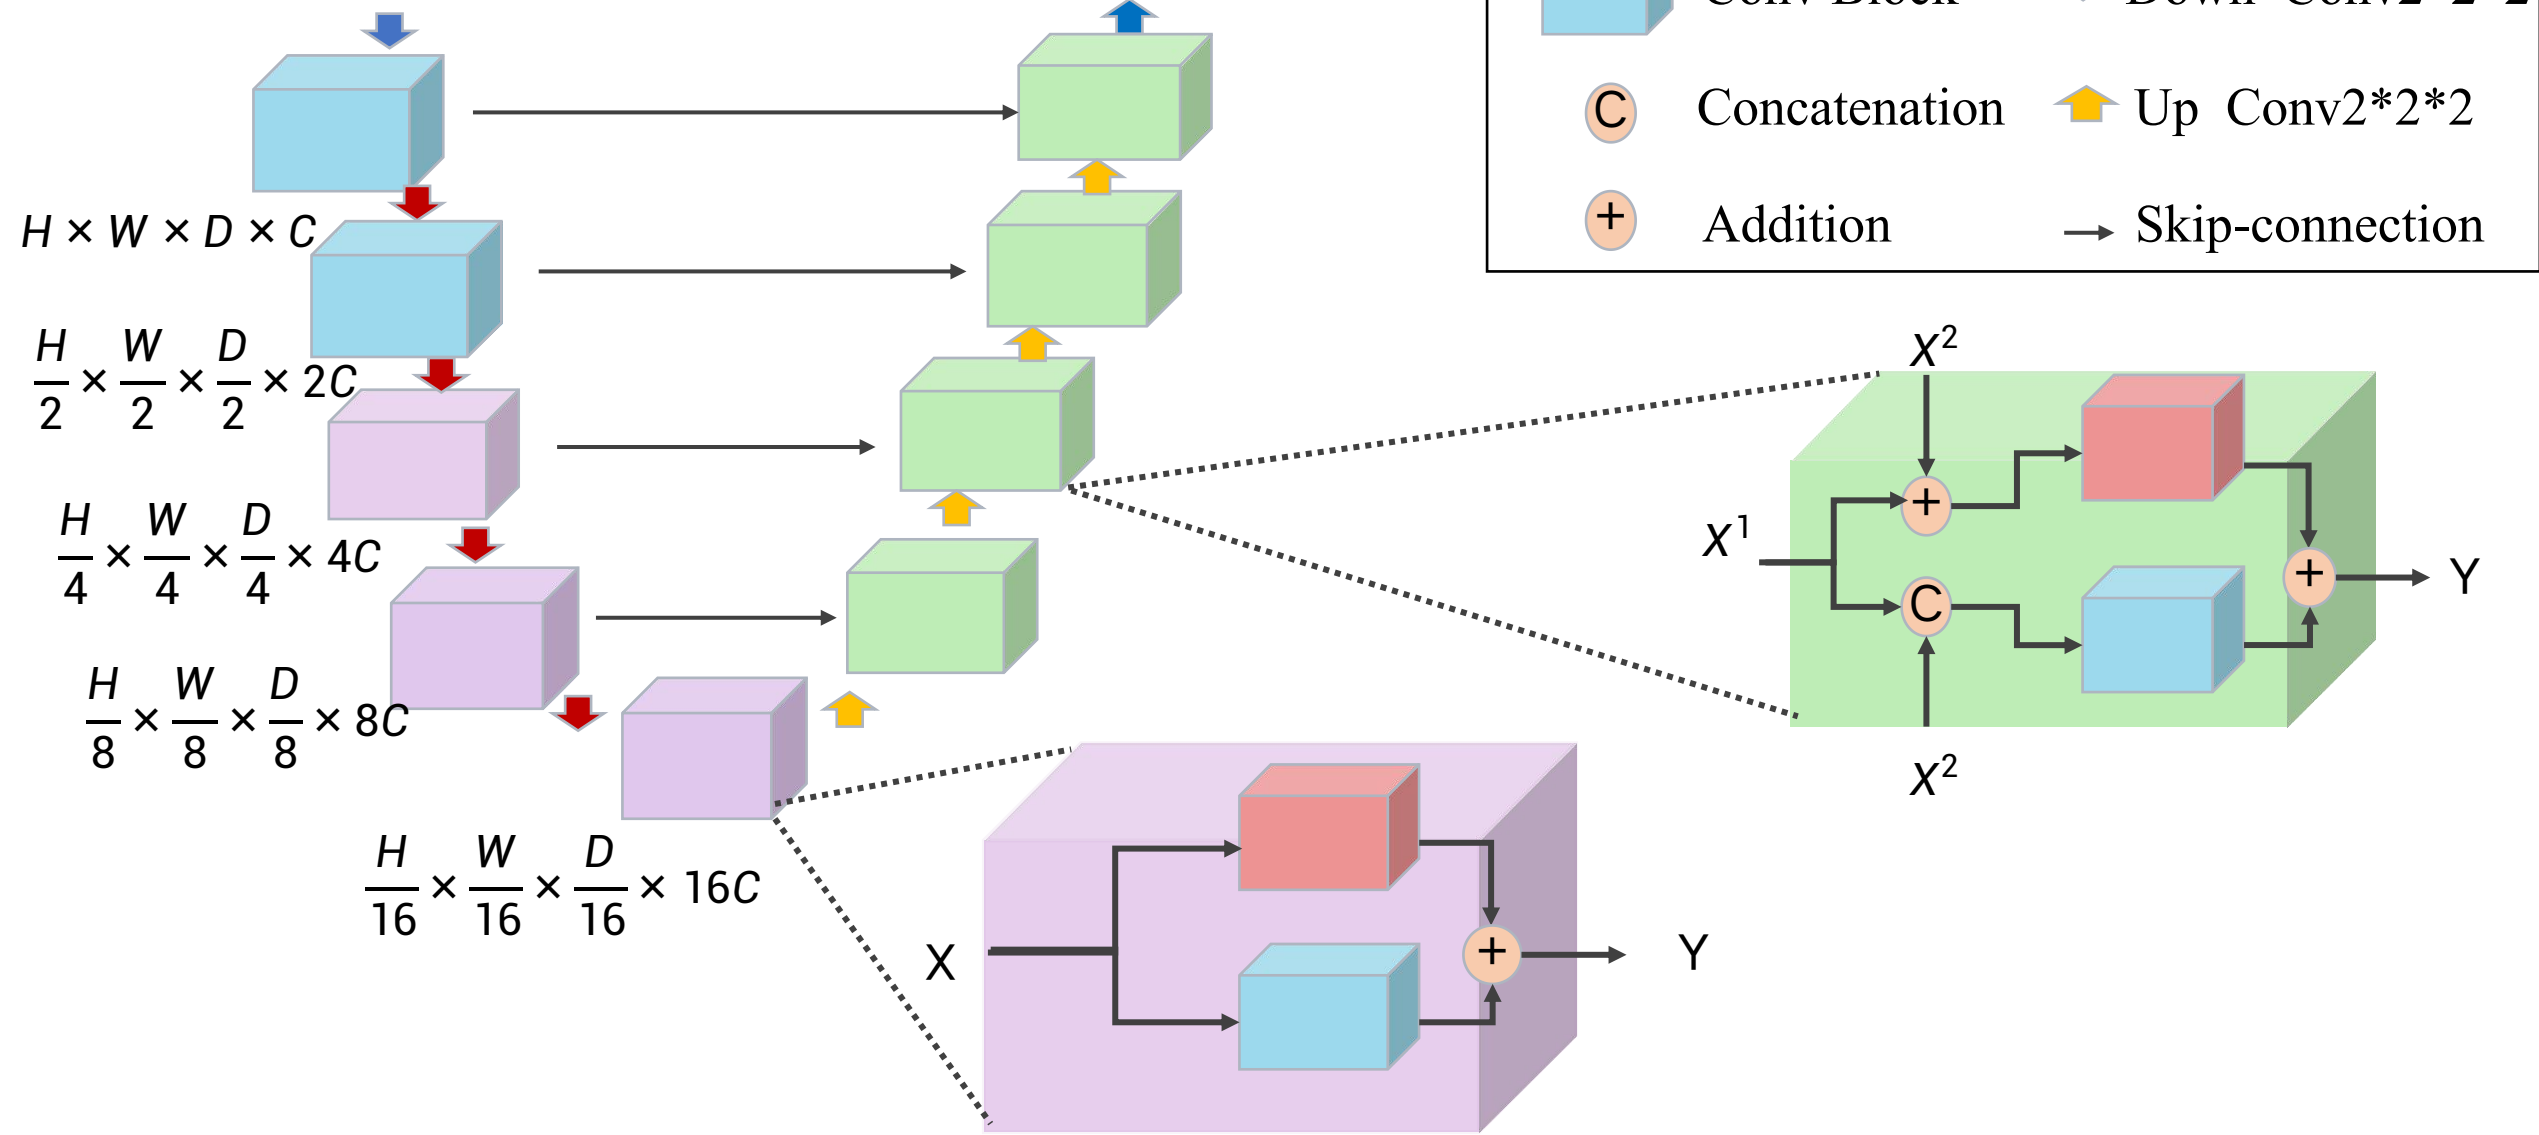

Supplement: supplementary_material [file attachment]

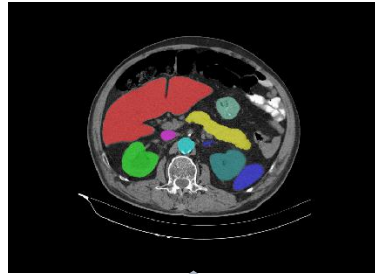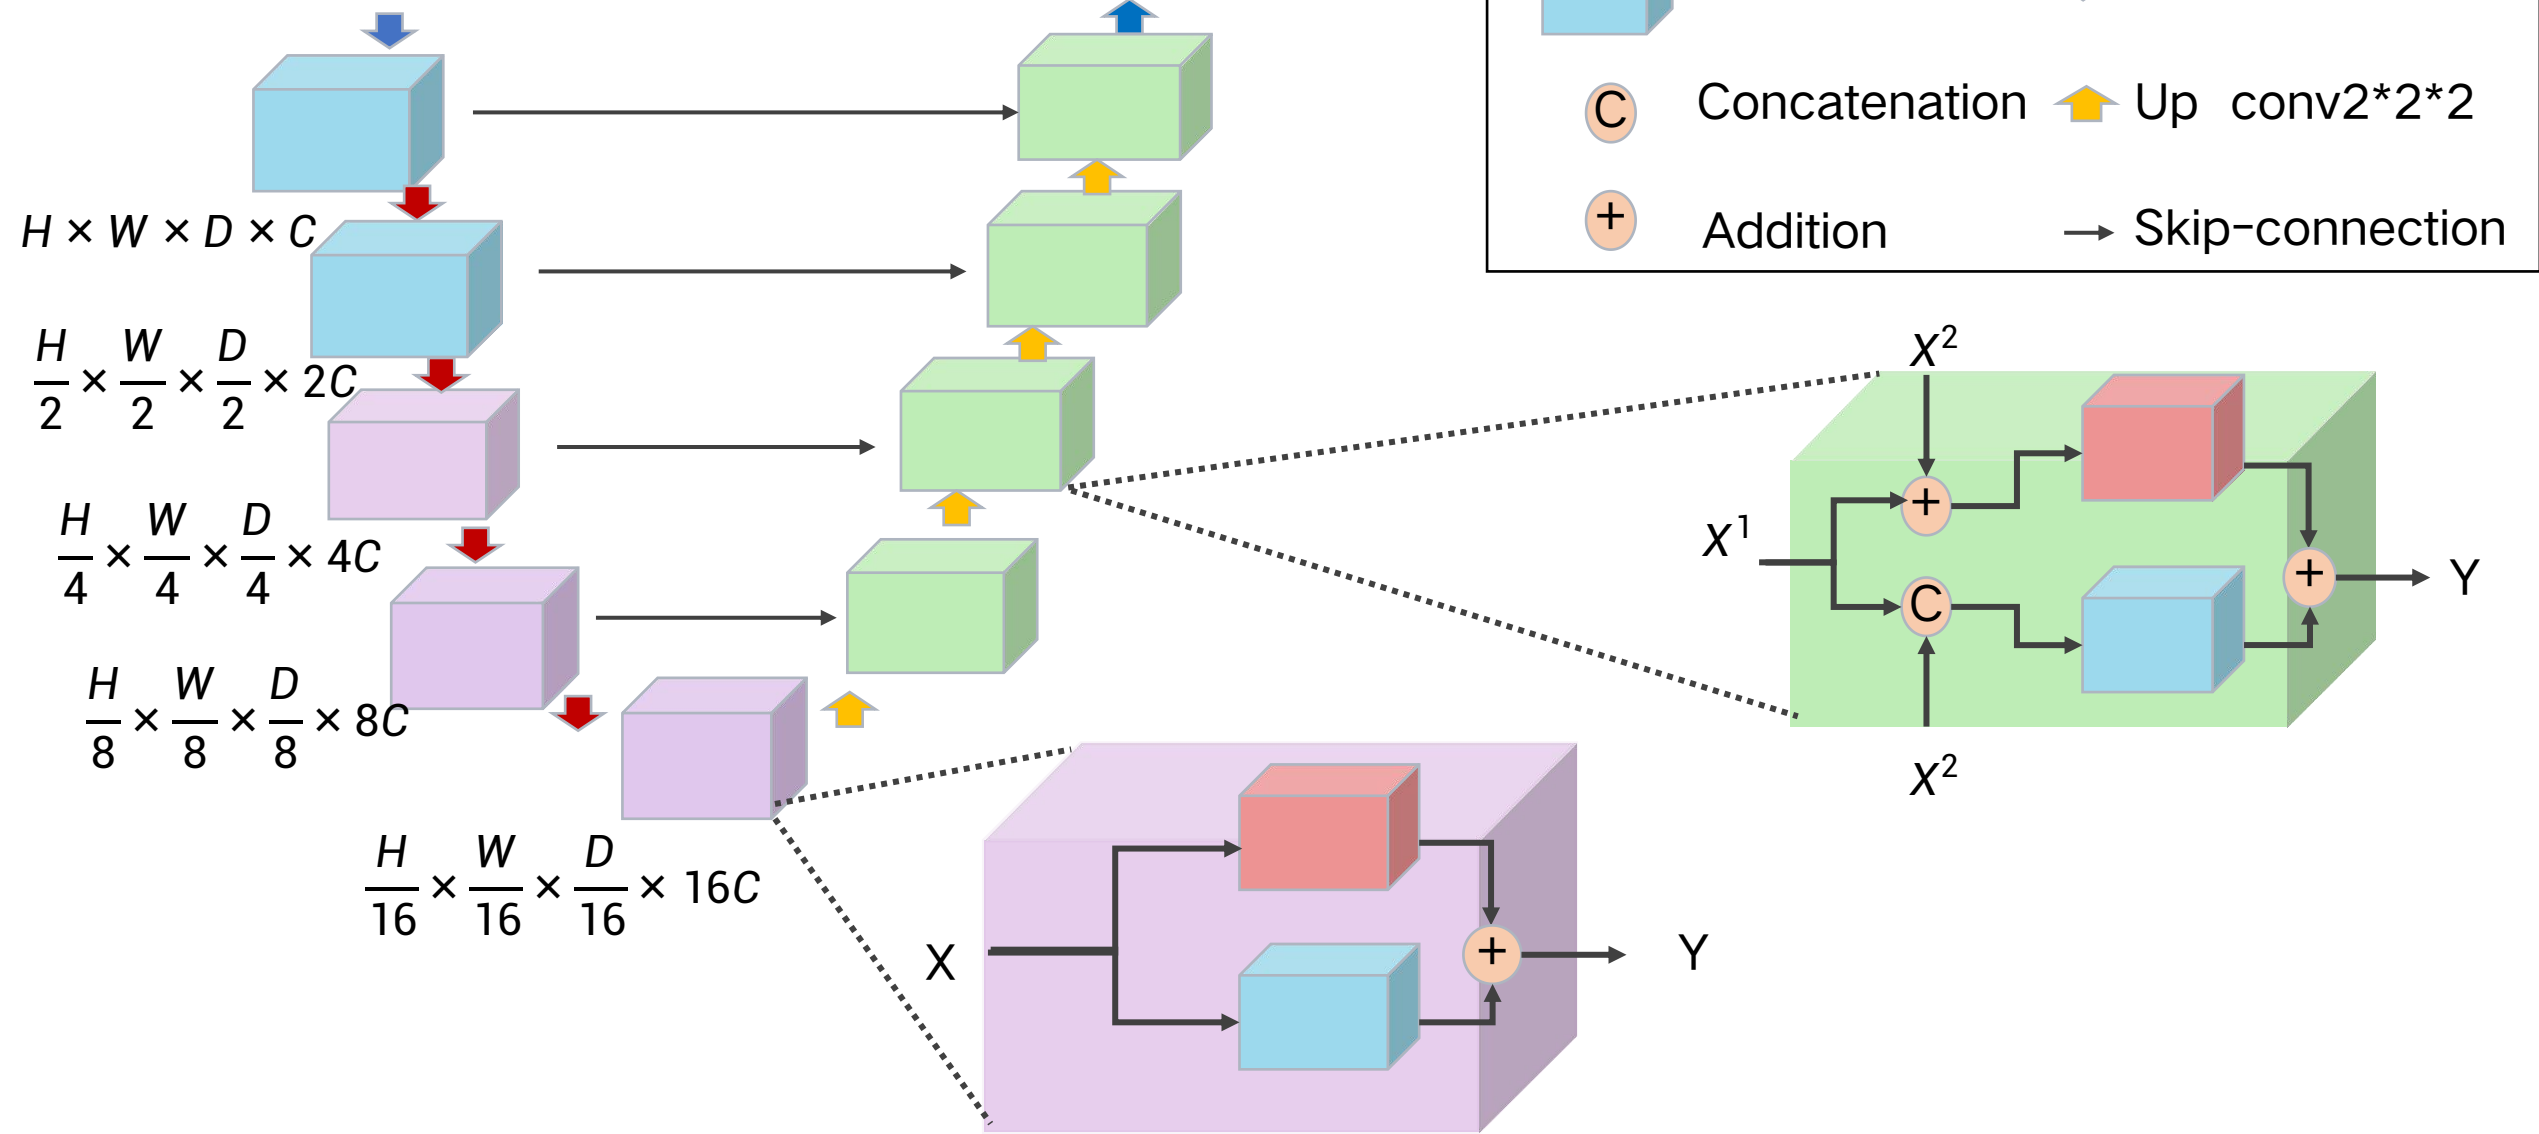

Supplement: supplementary_material [file attachment]

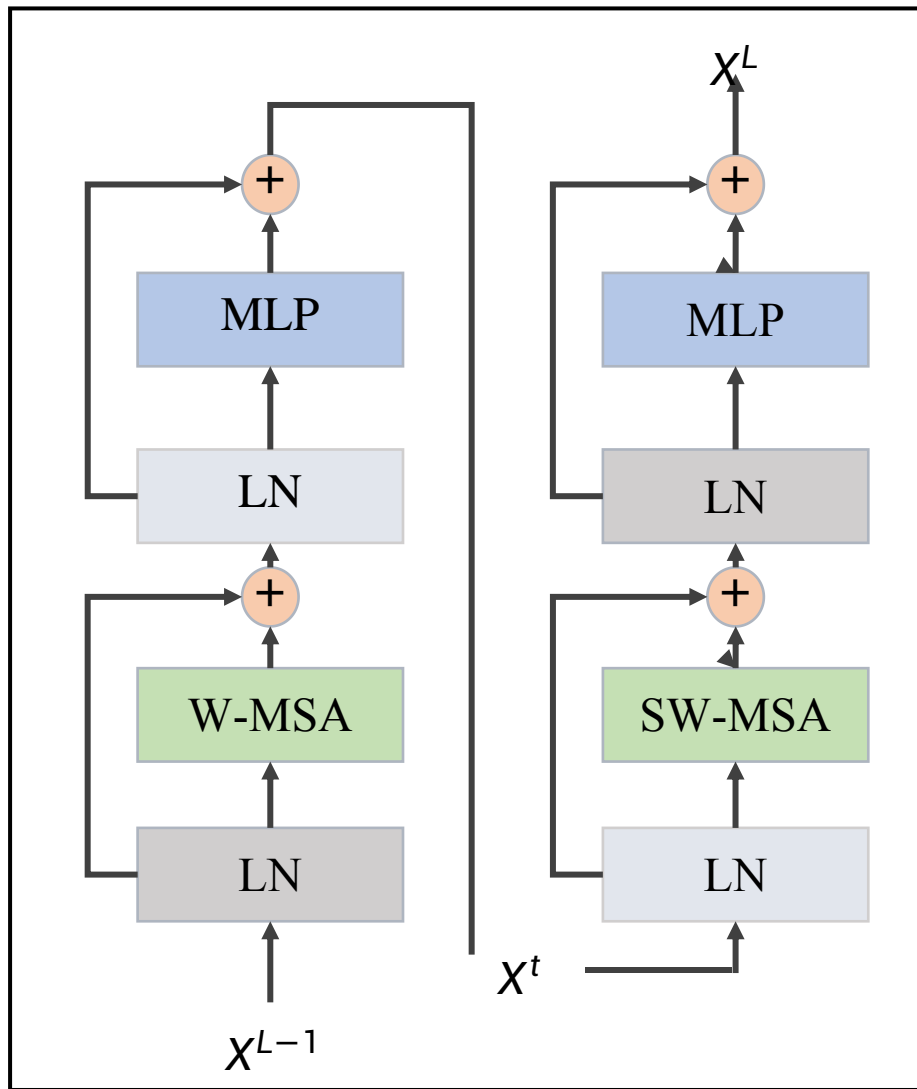

(a) SwinBlock3D

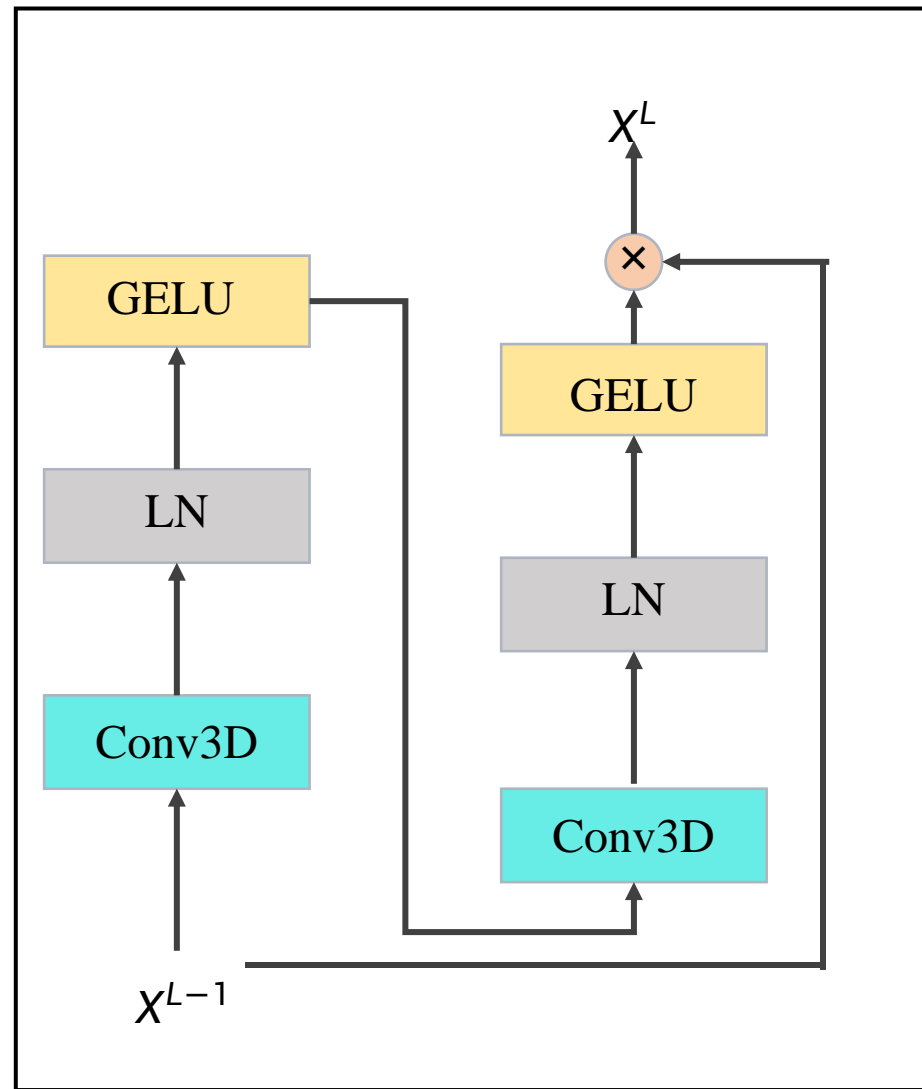

(b) ConvBlock3D

Supplement: supplementary_material [file attachment]
